# Supplementary material for: Quantifying the large-scale electrification equilibrium effects in dust storms using field observations at Qingtu Lake Observatory
Source: Copernicus journal article supplement (doi:10.5194/acp-18-17087-2018), 2018-12-04
Supplement: Supplementary file 1 [file acp-18-17087-2018-supplement.zip]

Archive with 5 entries (4 files):
- acp-18-17087-2018-supplement-title-page.pdf
- Supplement/
- Supplement/Table S1.xlsx
- Supplement/Supplement.pdf
- Supplement/Movie S1.MOV
