# Supplementary material for: Quantifying the large-scale electrification equilibrium effects in dust storms using field observations at Qingtu Lake Observatory
Source: Copernicus journal article supplement (doi:10.5194/acp-18-17087-2018), 2018-12-04
Supplement: Supplementary file 1 [file acp-18-17087-2018-supplement.zip › acp-18-17087-2018-supplement-title-page.pdf]

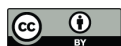

## *Supplement of*

# **Quantifying the large-scale electrification equilibrium effects in dust storms using field observations at Qingtu Lake Observatory**

**Huan Zhang and Xiaojing Zheng**

*Correspondence to:* Xiaojing Zheng (xjzheng@xidian.edu.cn)

- [acp-18-17087-2018-supplement-title-page.pdf](#)
- Supplement
  - [Movie S1.MOV](#)
  - [Supplement.pdf](#)
  - [Table S1.xlsx](#)

The copyright of individual parts of the supplement might differ from the CC BY 4.0 License.
