# Supplementary material for: Quantifying the large-scale electrification equilibrium effects in dust storms using field observations at Qingtu Lake Observatory
Source: Copernicus journal article supplement (doi:10.5194/acp-18-17087-2018), 2018-12-04
Supplement: Supplementary file 1 [file acp-18-17087-2018-supplement.zip › Supplement/Table S1.xlsx]

## Sheet: Sheet1
Table S1. Summary statistics of the total of 10 dust storms with significant at 5 %.
No. of dust storms	Duration (Chinese standard time, UTC+8)	Temperature (°C)	RH (%)	a0 (intercept)	a1 (slope)	r (Pearson's correlation)	R2 (determination coefficient)	F-values	p-values	n-values
1	17 April 2017/10:00-19:00	17.4	16.94	3.20095e-08	0.06896	0.44797	0.20068	114.5	0	458
		17.4	18.94	3.92155e-08	0.01832	0.35462	0.12575	4.2	0.0503	31
		17.4	20.94	1.61018e-08	0.29821	0.9851	0.97042	39800.6	0	1215
		17.4	22.94	-6.31689e-11	0.40584	0.97741	0.95533	26003.3	0	1218
		19.4	16.94	7.85715e-09	0.26448	0.93958	0.88281	34614.1	0	4597
		19.4	18.94	2.4579e-08	0.26521	0.90051	0.81093	48010	0	11196
		19.4	20.94	7.71093e-08	0.16924	0.9014	0.81252	32789.8	0	7568
		19.4	22.94	2.04804e-07	0.07113	0.77641	0.60281	5138.8	0	3388
		21.4	16.94	1.16595e-09	0.40315	0.88158	0.77718	387.2	0	113
		21.4	18.94	1.14759e-07	0.13541	0.87106	0.75875	7123.4	0	2267
		21.4	20.94	4.50162e-08	0.19965	0.88241	0.77865	1224.2	0	350
2	18 April 2017/15:00-18:00	17.61	33.24	-3.20822e-09	0.40837	0.9897	0.9795	50544	0	1060
		17.61	35.24	-3.18201e-09	0.38921	0.99145	0.98298	233107	0	4038
		17.61	37.24	-5.77724e-09	0.35197	0.98062	0.96162	79597	0	3179
		19.61	33.24	-6.64377e-09	0.44749	0.99609	0.99219	295402	0	2327
		19.61	35.24	-6.59894e-09	0.46735	0.99303	0.98612	13852	0	197
3	18 April 2017/22:00 to 19 April 2017/05:00	10.2	33.21	5.22179e-09	-0.000283852	-0.00159	2.52385e-06	0	0.98936	73
		10.2	35.21	3.18925e-08	-0.19401	-0.89425	0.79969	2311.5	0	581
		10.2	37.21	2.61421e-08	-0.15183	-0.60128	0.36153	939.4	0	1661
		10.2	39.21	-9.60895e-09	0.14898	0.7376	0.54406	1834.1	0	1539
		10.2	41.21	-2.78786e-09	0.07725	0.30399	0.09241	235	0	2310
		10.2	43.21	1.06942e-08	-0.04093	-0.22082	0.04876	78.9	0	1542
		12.2	13.21	-1.04263e-08	0.34291	0.6723	0.45199	1558.9	0	1892
		12.2	15.21	-2.61121e-09	0.16106	0.60164	0.36197	1577.2	0	2782
		12.2	17.21	2.7121e-09	0.07022	0.88977	0.79168	292.6	0	79
		12.2	19.21	2.40178e-09	0.07186	0.98409	0.96844	2823.2	0	94
		12.2	21.21	4.12075e-09	0.0573	0.98563	0.97147	2519.5	0	76
		12.2	23.21	5.25102e-09	0.04837	0.9362	0.87647	361.8	0	53
		12.2	25.21	4.1177e-09	0.05653	0.79466	0.63149	49.7	9.38693e-08	31
		12.2	27.21	9.58927e-09	0.01865	0.22057	0.04865	4.3	0.04128	86
		12.2	29.21	4.9044e-08	-0.26578	-0.32564	0.10604	14.6	0.000210784	125
		12.2	31.21	5.79401e-08	-0.32998	-0.76403	0.58374	396.9	0	285
		12.2	33.21	-5.05888e-08	0.39838	0.96777	0.93657	8298.1	0	564
		14.2	13.21	-1.56407e-08	0.3692	0.99564	0.9913	415036	0	3643
		14.2	15.21	-2.9915e-09	0.2461	0.99177	0.98361	30014	0	502
		14.2	17.21	-1.33686e-08	0.29725	0.998	0.996	35860	0	146
		14.2	19.21	-1.05108e-08	0.272	0.9725	0.94575	32323.7	0	1856
		14.2	21.21	-9.2468e-09	0.25869	0.91413	0.83564	11251.5	0	2215
		14.2	23.21	-7.68492e-09	0.22002	0.95856	0.91883	7697.4	0	682
		14.2	25.21	-4.53148e-09	0.18271	0.98906	0.97825	18032	0	403
		14.2	27.21	-1.79027e-08	0.51815	0.93446	0.87321	4421.4	0	644
		14.2	29.21	-3.34635e-08	0.92233	0.84228	0.70943	2339	0	960
		14.2	31.21	4.38345e-08	-1.10957	-0.48594	0.23613	114.4	0	372
4	19 April 2017/06:00-22:00	9.27	38.64	-2.89433e-09	0.1741	0.98814	0.97641	26656.9	0	646
		9.27	40.64	2.37533e-08	-0.11181	-0.70586	0.49824	2556.9	0	2577
		9.27	42.64	1.02752e-08	-0.03577	-0.51495	0.26517	1720.2	0	4769
		9.27	44.64	-9.29685e-10	0.03378	0.66572	0.44318	1956.4	0	2460
		9.27	46.64	1.65746e-09	-0.000502839	-0.00693	4.7958e-05	0.1	0.78341	1578
		11.27	24.64	-4.40486e-09	0.26164	0.99563	0.99129	47673.4	0	421
		11.27	26.64	-6.76662e-09	0.29122	0.98769	0.97554	32981.1	0	829
		11.27	28.64	-7.47051e-09	0.29233	0.97534	0.9513	14278.3	0	733
		11.27	30.64	-7.83464e-09	0.25253	0.91229	0.83227	6187.7	0	1249
		11.27	32.64	-7.13354e-09	0.23418	0.92528	0.85614	9938.7	0	1672
		11.27	34.64	-1.64521e-08	0.32697	0.95668	0.91524	4762.2	0	443
		11.27	36.64	-1.53189e-08	0.31469	0.93099	0.86674	4462	0	688
		11.27	38.64	-1.86519e-08	0.30955	0.9972	0.99441	54034.5	0	306
		11.27	40.64	5.58198e-09	-0.03667	-0.42311	0.17902	55.4	1.5319e-12	256
		11.27	42.64	-4.67332e-09	0.09876	0.55809	0.31146	114	0	254
		13.27	10.64	-1.43848e-08	0.86905	0.63813	0.40721	250	0	366
		13.27	12.64	-5.10085e-09	0.38792	0.99756	0.99512	101122	0	498
		13.27	14.64	8.97598e-09	0.05023	0.1768	0.03126	7.7	0.00592	241
		13.27	16.64	-9.15301e-09	0.53371	0.99713	0.99426	125293	0	725
		13.27	18.64	-8.74889e-09	0.48363	0.99686	0.99373	223631	0	1412
		13.27	20.64	-1.09097e-08	0.50131	0.99213	0.98432	114495	0	1826
		13.27	22.64	-5.83441e-10	0.22641	0.98107	0.9625	56393.5	0	2199
		13.27	24.64	-2.14021e-09	0.23687	0.98609	0.97238	41572.5	0	1183
		13.27	26.64	2.21807e-10	0.2095	0.93104	0.86683	924.3	0	144
		15.27	8.64	-1.23025e-09	0.51223	0.71082	0.50527	2282.6	0	2237
		15.27	10.64	-2.60768e-09	0.42571	0.66401	0.44091	15140	0	19200
		15.27	12.64	-1.32242e-09	0.37572	0.98881	0.97774	154013	0	3509
		15.27	14.64	-3.55113e-09	0.40143	0.99356	0.98716	131064	0	1707
		15.27	16.64	1.9635e-09	0.37171	0.96297	0.92731	14033.7	0	1102
		17.27	8.64	-5.95998e-09	0.75826	0.97901	0.95846	14603.5	0	635
		17.27	10.64	-5.54664e-09	0.71719	0.92824	0.86163	10591.7	0	1703
5	20 April 2017/08:00-17:00	6.917	13.39	1.10289e-07	0.08231	0.38749	0.15015	19.1	2.88723e-05	110
		6.917	15.39	2.5533e-08	0.19728	0.98104	0.96243	20264.2	0	793
		6.917	17.39	2.00796e-08	0.19322	0.90642	0.82159	5627.5	0	1224
		6.917	19.39	3.22784e-09	0.26201	0.98479	0.96982	25353	0	791
		6.917	21.39	-1.09322e-08	0.37133	0.9695	0.93993	29920	0	1914
		8.917	13.39	3.89249e-08	0.17514	0.94219	0.88772	43755.4	0	5536
		8.917	15.39	1.68667e-08	0.22517	0.99373	0.9875	123294	0	1563
		8.917	17.39	8.04759e-09	0.27179	0.98076	0.96189	12999.9	0	517
		10.917	13.39	2.91691e-09	0.34376	0.98569	0.97158	202856	0	5935
		10.917	15.39	3.50062e-09	0.33913	0.96509	0.9314	44519.4	0	3281
		10.917	17.39	9.65003e-09	0.31276	0.98819	0.97652	1206.1	0	31
		12.917	11.39	-5.65799e-09	0.48525	0.92461	0.8549	33606.2	0	5706
		12.917	13.39	-4.26802e-09	0.48578	0.93285	0.8702	33454.5	0	4992
6	22 April 2017/12:00-17:00	21.7	4.742	1.79509e-08	2.15872	0.89899	0.80819	35527.7	0	8434
		21.7	6.742	1.17804e-08	1.91226	0.89779	0.80602	7712.2	0	1858
		23.7	4.742	2.7576e-08	1.90467	0.96005	0.92169	76502.6	0	6502
		23.7	6.742	3.49047e-08	1.44868	0.96515	0.93152	16390.9	0	1207
7	3 May 2017/08:00-18:00	11.01	24.207	9.41484e-08	0.07613	0.8088	0.65415	261	0	140
		11.01	26.207	7.47685e-08	0.08774	0.82082	0.67374	2027.8	0	984
		11.01	36.207	-5.53391e-08	0.88822	0.98033	0.96106	1480.6	0	62
		11.01	38.207	-1.72205e-08	0.25495	0.99731	0.99462	75218.7	0	409
		11.01	40.207	-1.90253e-08	0.28717	0.99935	0.9987	271850	0	356
		11.01	42.207	-9.91365e-09	0.16249	0.95855	0.91883	10900.4	0	965
		11.01	44.207	3.18103e-09	0.08128	0.80521	0.64837	291.3	0	160
		11.01	46.207	-6.61956e-09	0.09324	0.97912	0.95868	3991	0	174
		11.01	48.207	-1.59289e-08	0.11899	0.996	0.99202	52208.1	0	422
		11.01	50.207	-1.41358e-08	0.11337	0.97256	0.94587	8597	0	494
		11.01	52.207	-2.66127e-09	0.07202	0.91484	0.83694	3023.1	0	591
		13.01	18.207	9.95595e-09	0.25423	0.98146	0.96326	9936.5	0	381
		13.01	20.207	1.9208e-08	0.17533	0.78542	0.61689	4054.6	0	2520
		13.01	22.207	-2.57377e-09	0.24943	0.88352	0.78061	15947.8	0	4484
		13.01	24.207	-4.04025e-09	0.23527	0.92023	0.84683	8326	0	1508
		13.01	26.207	7.36511e-09	0.18669	0.88285	0.77942	8332.1	0	2360
		13.01	28.207	-2.04766e-08	0.17332	0.9941	0.98823	25361.1	0	304
		13.01	30.207	-1.23342e-08	0.16946	0.99574	0.9915	104726	0	900
		13.01	32.207	-1.3063e-08	0.17736	0.99493	0.98989	80272.4	0	822
		13.01	34.207	-1.07521e-08	0.14185	0.9938	0.98765	63408.7	0	795
		13.01	36.207	-1.31268e-08	0.17248	0.99652	0.99305	61872.6	0	435
		13.01	38.207	2.76494e-08	0.06383	0.59932	0.35918	77.9	4.1e-15	141
		13.01	40.207	-8.78229e-09	0.13894	0.99564	0.9913	3304.7	0	31
		13.01	42.207	8.75554e-10	0.10496	0.99407	0.98817	4930	0	61
		15.01	8.207	-7.38606e-08	0.35418	0.95176	0.90585	8630	0	899
		15.01	10.207	-1.05068e-07	0.44716	0.83071	0.69008	6011.8	0	2702
		15.01	12.207	-6.09783e-08	0.41565	0.89602	0.80284	7264.6	0	1786
		15.01	14.207	3.22583e-08	0.12573	0.70363	0.49509	2876	0	2935
		15.01	16.207	-1.52059e-08	0.24368	0.97877	0.958	37017.1	0	1625
		15.01	18.207	1.37881e-08	0.23409	0.99666	0.99333	26049.5	0	177
		15.01	20.207	-4.38493e-09	0.36139	0.95974	0.9211	2346.6	0	203
		17.01	8.207	1.96123e-08	0.18385	0.67854	0.46041	4192.1	0	4915
		17.01	10.207	-2.31807e-08	0.24286	0.90739	0.82336	5216	0	1121
		17.01	12.207	-1.75145e-07	0.73834	0.80085	0.64136	239.6	0	136
8	10 May 2017/10:00-19:00	22.81	7.605	4.07318e-09	0.18437	0.2569	0.066	190.6	0	2700
		22.81	9.605	4.06045e-09	0.42065	0.91548	0.83811	18720.5	0	3618
		24.81	7.605	7.33312e-09	1.03513	0.80871	0.65402	3807.1	0	2016
		24.81	9.605	-1.10966e-08	1.08266	0.83167	0.69167	50998.6	0	22736
		26.81	7.605	4.23146e-09	1.08691	0.8529	0.72743	1019.5	0	384
		26.81	9.605	-1.04722e-08	1.01729	0.95874	0.91918	10747	0	947
9	12 May 2017/11:00-16:00	28.57	3.878	1.04307e-08	2.58589	0.96017	0.92193	18468.3	0	1566
		28.57	5.878	-1.69908e-09	2.67787	0.92259	0.85117	22852.8	0	3998
		30.57	3.878	1.39251e-08	2.4707	0.92758	0.8604	69866.2	0	11338
		30.57	5.878	3.80583e-08	2.13791	0.98167	0.96367	29101.2	0	1099
10	20 May 2017/23:00 to 21 May 2017/01:00	23.9	20.94	2.94558e-08	0.68914	0.99652	0.99306	109208	0	765
		19.96	23.7	7.71152e-08	0.14106	0.68864	0.47422	2467.7	0	2738
		19.96	25.7	-4.0145e-09	0.2778	0.92372	0.85326	9536.5	0	1642
